# Supplementary material for: Associations of systemic inflammation markers with identification of pulmonary nodule and incident lung cancer in Chinese population
Source: PubMed Central journal article supplement (PMC9189452; doi:10.1002/cam4.4606), 2022-04-05

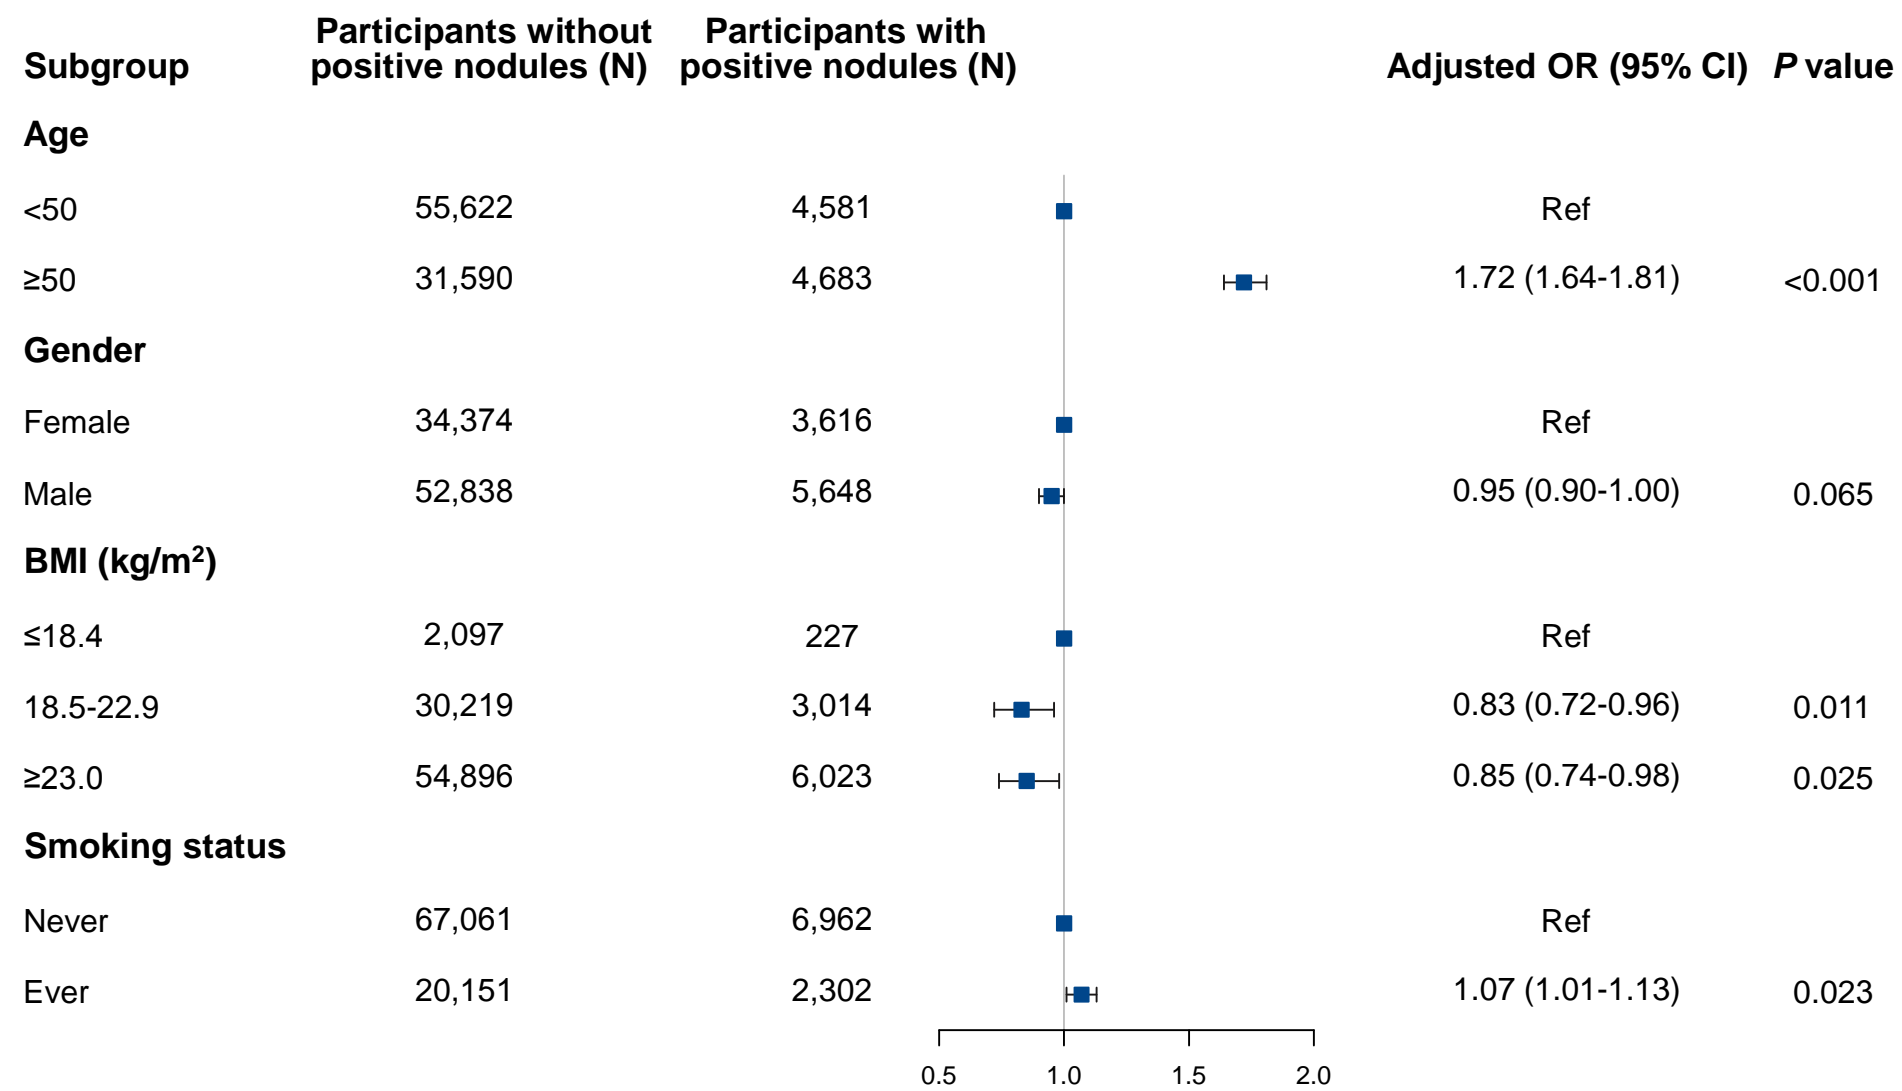

Supplement: CAM4-11-2482-s002.pdf [file CAM4-11-2482-s002.pdf]
