# Supplementary material for: Associations of systemic inflammation markers with identification of pulmonary nodule and incident lung cancer in Chinese population
Source: PubMed Central journal article supplement (PMC9189452; doi:10.1002/cam4.4606), 2022-04-05
Supplement: CAM4-11-2482-s003.pdf [file CAM4-11-2482-s003.pdf]

Total unique participants with  $\geq 1$  chest CT (2017-2020)  
(N = 112,629)

Participants with their first CT scan included in this  
cross-sectional analysis  
(N = 96,476)

**Some individuals met one or more of the following  
exclusion criteria (N = 16,153 )**

- A history of lung cancer or lung surgery (N = 440)
- A history of other malignancy (N = 4,175)
- Missing data on smoking status, BMI, platelets,  
neutrophil, lymphocyte, and monocyte (N = 11,495)
- Lung mass (N = 43)
